# Supplementary material for: Association of Maternal Dietary Patterns during Pregnancy and Offspring Weight Status across Infancy: Results from a Prospective Birth Cohort in China
Source: MDPI journal article supplement (doi:10.3390/nu13062040), 2021-06-15
Supplement: s1 [file s1]

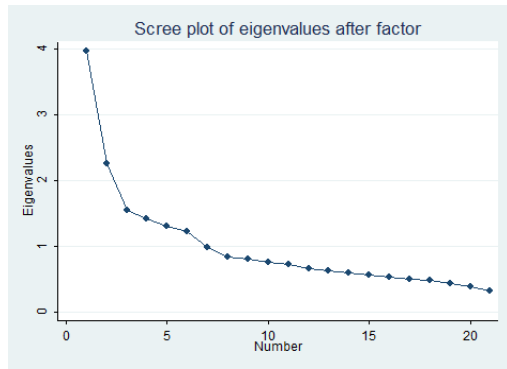

a.

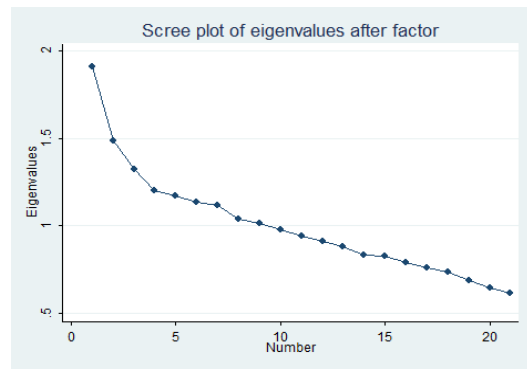

b.

**Figure S1.** Scree plot from exploratory factor analysis.

a: food Frequency Questionnaire; b: three-Day Food Diaries

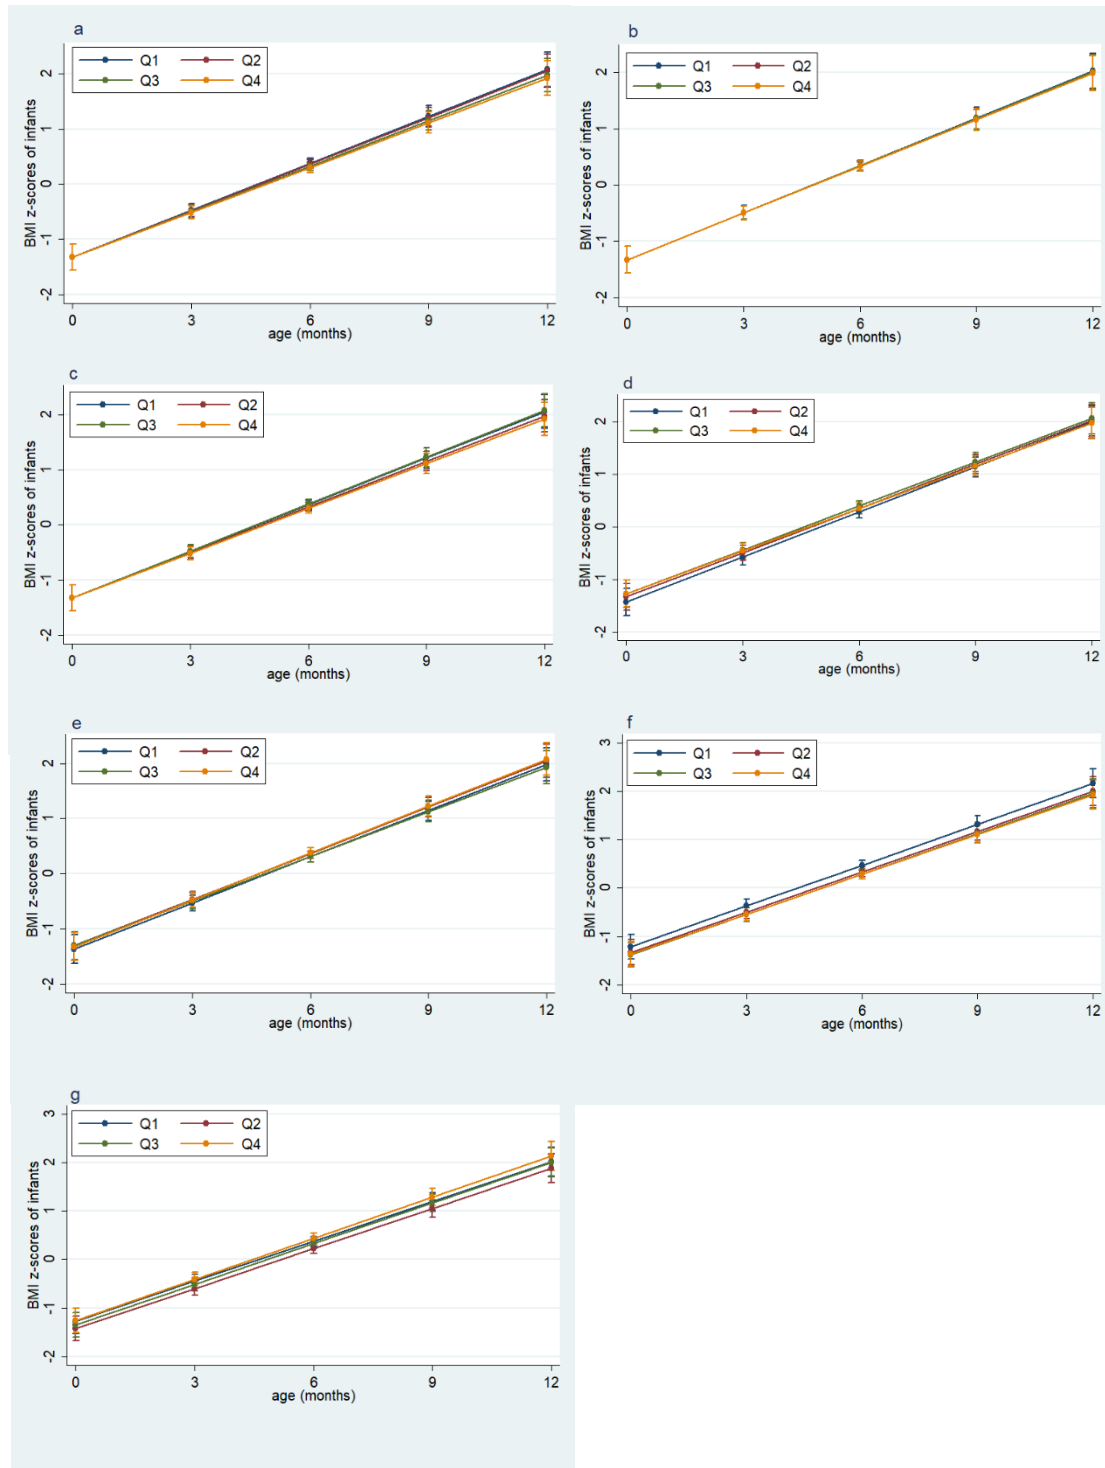

**Figure S2.** Predicted linear mixed effects models of BMI z-score and a) fish-seafood pattern (FFQ), b) protein rich pattern (FFQ), c) vegetable-fruit-rice pattern (FFQ), d) traditional pattern (TFD), e) sweet foods pattern (TFD), f) fried food-bean-dairy pattern (TFD), g) whole grain-seafood pattern (TFD) score quartiles of mothers as a function of age. Models are adjusted for other dietary patterns derived from the same dietary assessment tool (TFD or FFQ), pre-pregnancy BMI, age, parity, family income, education level, ethnicity, smoking status, total energy intake, physical activity and paternal BMI.

FFQ: food frequency questionnaire; TFD: three-day food diaries; BMI: body mass index; SD: standard deviation

**Table S1. Characteristics of participants included and excluded in the present study.**

| Characteristics                 | Participants, mean $\pm$ SD or n (%) |            |          |
|---------------------------------|--------------------------------------|------------|----------|
|                                 | Included                             | Excluded   | <i>p</i> |
| <b>Mothers</b>                  |                                      |            |          |
| Age at enrollment (Years)       |                                      |            | 0.001    |
| <25                             | 53 (5.7)                             | 19 (5.3)   |          |
| 25-29                           | 399 (42.6)                           | 147 (41.0) |          |
| 30-35                           | 344 (36.7)                           | 106 (29.5) |          |
| >36                             | 141 (15.1)                           | 87 (24.2)  |          |
| Ethnicity                       |                                      |            | <0.001   |
| Han                             | 787 (84.0)                           | 261 (72.7) |          |
| Others                          | 150 (16.0)                           | 98 (27.3)  |          |
| Educational attainment          |                                      |            | 0.791    |
| Middle school or below          | 76 (8.1)                             | 30 (9.3)   |          |
| High school                     | 146 (15.6)                           | 55 (17.0)  |          |
| College                         | 628 (67.0)                           | 211 (65.3) |          |
| Graduate or above               | 87 (9.3)                             | 27 (8.4)   |          |
| Household income per year, CNY  |                                      |            | 0.460    |
| <30,000                         | 247 (26.4)                           | 90 (27.9)  |          |
| 30,000-<50,000                  | 256 (27.3)                           | 77 (23.8)  |          |
| 50,000-<70,000                  | 210 (22.4)                           | 68 (21.1)  |          |
| $\geq 70,000$                   | 224 (23.9)                           | 88 (27.2)  |          |
| Parity                          |                                      |            | 0.007    |
| primiparous                     | 739 (78.9)                           | 231 (71.5) |          |
| multiparous                     | 198 (21.1)                           | 92 (28.5)  |          |
| Smoking status                  |                                      |            | <0.001   |
| Yes                             | 4 (0.4)                              | 40 (11.1)  |          |
| No                              | 933 (99.6)                           | 319 (88.9) |          |
| Pre-pregnancy BMI category      |                                      |            | 0.796    |
| <18.5, kg/m <sup>2</sup>        | 123 (13.1)                           | 43 (13.3)  |          |
| 18.5-<24.0, kg/m <sup>2</sup>   | 566 (60.4)                           | 195 (60.4) |          |
| 24.0-<28.0, kg/m <sup>2</sup>   | 186 (19.9)                           | 59 (18.3)  |          |
| $\geq 28.0$ , kg/m <sup>2</sup> | 62 (6.6)                             | 26 (8.1)   |          |
| Physical Activity               |                                      |            | <0.001   |
| <100 MET-hour/week              | 230 (24.6)                           | 135 (37.6) |          |
| 100 to <200 MET-hour/week       | 527 (56.2)                           | 153 (42.6) |          |
| $\geq 200$ MET-hour/week        | 180 (19.2)                           | 71 (19.8)  |          |
| Energy intake                   |                                      |            | <0.001   |
| <2100 Kcal/d                    | 576 (61.5)                           | 117 (32.6) |          |
| $\geq 2100$ Kcal/d              | 361 (38.5)                           | 242 (67.4) |          |
| <b>Fathers</b>                  |                                      |            |          |
| BMI at enrollment (n=903)       |                                      |            | 0.643    |
| <18.5, kg/m <sup>2</sup>        | 22 (2.4)                             | 8 (2.6)    |          |
| 18.5-<24.0, kg/m <sup>2</sup>   | 344 (38.1)                           | 111 (35.9) |          |

|                               |            |            |       |
|-------------------------------|------------|------------|-------|
| 24.0-<28.0, kg/m <sup>2</sup> | 341 (37.8) | 129 (41.8) |       |
| ≥28.0, kg/m <sup>2</sup>      | 196 (21.7) | 61 (19.7)  |       |
| <b>Infants</b>                |            |            |       |
| Sex                           |            |            | 0.930 |
| Male                          | 447 (47.7) | 155 (48.0) |       |
| Female                        | 490 (52.3) | 168 (52.0) |       |

---

SD: standard deviation; CNY, Chinese Yuan; BMI, body mass index

Table S2. Spearman correlation between dietary patterns driven from food frequency questionnaires and three-day food diaries

| Dietary patterns driven from TFD    | Dietary patterns driven from FFQ |          |                            |          |                                    |          |
|-------------------------------------|----------------------------------|----------|----------------------------|----------|------------------------------------|----------|
|                                     | Fish-seafood pattern (FFQ)       |          | Protein rich pattern (FFQ) |          | Vegetable-fruit-rice pattern (FFQ) |          |
|                                     | <i>ρ</i>                         | <i>p</i> | <i>ρ</i>                   | <i>p</i> | <i>ρ</i>                           | <i>p</i> |
| Traditional pattern (TFD)           | 0.013                            | 0.700    | 0.000                      | 0.991    | 0.131                              | <0.001   |
| Sweet foods pattern (TFD)           | -0.058                           | 0.075    | -0.068                     | 0.038    | 0.063                              | 0.055    |
| Fried food-bean-dairy pattern (TFD) | -0.026                           | 0.434    | 0.008                      | 0.806    | -0.083                             | 0.011    |
| Whole grain-seafood pattern (TFD)   | -0.013                           | 0.688    | 0.023                      | 0.483    | -0.042                             | 0.205    |

FFQ: food frequency questionnaire; TFD: three-day food diaries; BMI: body mass index; SD: standard deviation

**Table S3. Associations of maternal dietary pattern quartiles with predicted WFL z-scores at birth, 3, 6, 8, 12 months in the “Born in Shenyang” Cohort.**

| Maternal dietary patterns          | Mean difference in predicted WFL z-score, SD units |       |               |          |                |          |               |          |               |           |               |
|------------------------------------|----------------------------------------------------|-------|---------------|----------|----------------|----------|---------------|----------|---------------|-----------|---------------|
|                                    | n                                                  | Birth |               | 3 months |                | 6 months |               | 8 months |               | 12 months |               |
|                                    |                                                    | β     | 95% CI        | β        | 95% CI         | β        | 95% CI        | β        | 95% CI        | β         | 95% CI        |
| Food Frequency Questionnaire       |                                                    |       |               |          |                |          |               |          |               |           |               |
| Fish-seafood pattern (FFQ)         |                                                    |       |               |          |                |          |               |          |               |           |               |
| Q1                                 | 234                                                | ref   | ref           | ref      | ref            | ref      | ref           | ref      | ref           | ref       | ref           |
| Q2                                 | 231                                                | 0.05  | (-0.13, 0.22) | 0.03     | (-0.12, 0.18)  | 0.01     | (-0.13, 0.16) | -0.01    | (-0.17, 0.16) | -0.02     | (-0.23, 0.18) |
| Q3                                 | 235                                                | 0.09  | (-0.09, 0.28) | 0.06     | (-0.10, 0.22)  | 0.03     | (-0.12, 0.18) | -0.01    | (-0.18, 0.17) | -0.04     | (-0.25, 0.17) |
| Q4                                 | 237                                                | 0.16  | (-0.03, 0.36) | 0.10     | (-0.06, 0.27)  | 0.04     | (-0.12, 0.21) | -0.02    | (-0.21, 0.17) | -0.08     | (-0.31, 0.15) |
| Protein rich pattern (FFQ)         |                                                    |       |               |          |                |          |               |          |               |           |               |
| Q1                                 | 237                                                | ref   | ref           | ref      | ref            | ref      | ref           | ref      | ref           | ref       | ref           |
| Q2                                 | 231                                                | -0.16 | (-0.33, 0.01) | -0.15    | (-0.29, -0.01) | -0.14    | (-0.28, 0.01) | -0.13    | (-0.29, 0.04) | -0.11     | (-0.32, 0.09) |
| Q3                                 | 235                                                | -0.16 | (-0.34, 0.03) | -0.14    | (-0.30, 0.02)  | -0.12    | (-0.27, 0.03) | -0.10    | (-0.28, 0.07) | -0.09     | (-0.30, 0.13) |
| Q4                                 | 234                                                | -0.15 | (-0.35, 0.05) | -0.15    | (-0.32, 0.02)  | -0.15    | (-0.31, 0.02) | -0.15    | (-0.33, 0.04) | -0.14     | (-0.38, 0.09) |
| Vegetable-fruit-rice pattern (FFQ) |                                                    |       |               |          |                |          |               |          |               |           |               |
| Q1                                 | 229                                                | ref   | ref           | ref      | ref            | ref      | ref           | ref      | ref           | ref       | ref           |
| Q2                                 | 236                                                | 0.14  | (-0.03, 0.30) | 0.10     | (-0.04, 0.24)  | 0.07     | (-0.07, 0.20) | 0.03     | (-0.13, 0.19) | 0.00      | (-0.20, 0.19) |
| Q3                                 | 236                                                | 0.18  | (0.02, 0.35)  | 0.17     | (0.03, 0.31)   | 0.16     | (0.02, 0.30)  | 0.14     | (-0.01, 0.30) | 0.13      | (-0.06, 0.33) |
| Q4                                 | 236                                                | 0.18  | (0.01, 0.35)  | 0.13     | (-0.01, 0.28)  | 0.09     | (-0.06, 0.23) | 0.05     | (-0.12, 0.21) | 0.00      | (-0.20, 0.20) |
| Three-day food dairies             |                                                    |       |               |          |                |          |               |          |               |           |               |
| Traditional pattern (TFD)          |                                                    |       |               |          |                |          |               |          |               |           |               |
| Q1                                 | 233                                                | ref   | ref           | ref      | ref            | ref      | ref           | ref      | ref           | ref       | ref           |
| Q2                                 | 236                                                | 0.04  | (-0.13, 0.20) | 0.04     | (-0.10, 0.17)  | 0.04     | (-0.10, 0.17) | 0.03     | (-0.12, 0.19) | 0.03      | (-0.16, 0.23) |
| Q3                                 | 231                                                | 0.14  | (-0.04, 0.30) | 0.11     | (-0.04, 0.25)  | 0.08     | (-0.06, 0.22) | 0.05     | (-0.11, 0.22) | 0.03      | (-0.17, 0.23) |
| Q4                                 | 237                                                | 0.08  | (-0.10, 0.26) | 0.04     | (-0.12, 0.20)  | 0.01     | (-0.15, 0.16) | -0.03    | (-0.21, 0.14) | -0.07     | (-0.28, 0.14) |

Sweet foods pattern (TFD)

|    |     |      |               |      |               |      |               |       |               |       |               |
|----|-----|------|---------------|------|---------------|------|---------------|-------|---------------|-------|---------------|
| Q1 | 232 | ref  | ref           | ref  | ref           | ref  | ref           | ref   | ref           | ref   | ref           |
| Q2 | 238 | 0.08 | (-0.09, 0.24) | 0.08 | (-0.06, 0.22) | 0.08 | (-0.06, 0.21) | 0.07  | (-0.08, 0.23) | 0.07  | (-0.12, 0.27) |
| Q3 | 230 | 0.06 | (-0.11, 0.22) | 0.03 | (-0.11, 0.18) | 0.01 | (-0.13, 0.15) | -0.01 | (-0.17, 0.15) | -0.03 | (-0.23, 0.16) |
| Q4 | 237 | 0.02 | (-0.15, 0.19) | 0.04 | (-0.10, 0.18) | 0.06 | (-0.08, 0.20) | 0.08  | (-0.08, 0.24) | 0.10  | (-0.09, 0.30) |

Fried food-bean-dairy pattern (TFD)

|    |     |       |               |       |                |       |                |       |                |       |                |
|----|-----|-------|---------------|-------|----------------|-------|----------------|-------|----------------|-------|----------------|
| Q1 | 231 | ref   | ref           | ref   | ref            | ref   | ref            | ref   | ref            | ref   | ref            |
| Q2 | 230 | -0.02 | (-0.19, 0.15) | -0.06 | (-0.20, 0.08)  | -0.10 | (-0.24, 0.03)  | -0.15 | (-0.30, 0.01)  | -0.19 | (-0.38, 0.01)  |
| Q3 | 233 | -0.12 | (-0.29, 0.04) | -0.15 | (-0.29, -0.01) | -0.18 | (-0.32, -0.04) | -0.20 | (-0.36, -0.04) | -0.23 | (-0.43, -0.03) |
| Q4 | 243 | -0.12 | (-0.29, 0.05) | -0.15 | (-0.30, -0.01) | -0.19 | (-0.33, -0.04) | -0.22 | (-0.38, -0.06) | -0.26 | (-0.45, -0.06) |

Whole grain-seafood pattern (TFD)

|    |     |       |                |       |                |       |                |       |               |       |               |
|----|-----|-------|----------------|-------|----------------|-------|----------------|-------|---------------|-------|---------------|
| Q1 | 235 | ref   | ref            | ref   | ref            | ref   | ref            | ref   | ref           | ref   | ref           |
| Q2 | 237 | -0.19 | (-0.36, -0.03) | -0.18 | (-0.32, -0.04) | -0.16 | (-0.30, -0.03) | -0.16 | (-0.31, 0.00) | -0.14 | (-0.33, 0.05) |
| Q3 | 231 | -0.08 | (-0.25, 0.08)  | -0.06 | (-0.20, 0.08)  | -0.04 | (-0.18, 0.10)  | -0.02 | (-0.18, 0.14) | 0.00  | (-0.20, 0.20) |
| Q4 | 234 | -0.05 | (-0.22, 0.12)  | -0.01 | (-0.15, 0.14)  | 0.03  | (-0.10, 0.17)  | 0.08  | (-0.08, 0.23) | 0.12  | (-0.08, 0.31) |

Adjusted for other dietary patterns derived from the same dietary assessment tool (TFD or FFQ), pre-pregnancy BMI, age, parity, family income, education level, ethnicity, smoking status, total energy intake, physical activity, paternal BMI

WFL: weight for length; Q1: quartile 1; Q2: quartile 2; Q3: quartile 3; Q4: quartile 4; OR: odd ratio; CI: confidence interval; FFQ: food frequency questionnaire; TFD: three-day food diaries; BMI: body mass index

**Table S4. Associations of maternal dietary pattern scores during pregnancy, in quartiles, with risk of being overweight/obesity across the infancy, with further adjustment for gestational weight gain.**

| Maternal Dietary Patterns<br>during pregnancy | Risk of being overweight/obesity across infancy<br>(ref.=non overweight/obesity, n=903) |                   |                   |                   |       |
|-----------------------------------------------|-----------------------------------------------------------------------------------------|-------------------|-------------------|-------------------|-------|
|                                               | Q1                                                                                      | Q2                | Q3                | Q4                | P for |
|                                               | Reference                                                                               | OR (95% CI)       | OR (95% CI)       | OR (95% CI)       | trend |
| <b>Food Frequency Questionnaire</b>           |                                                                                         |                   |                   |                   |       |
| Fish-seafood pattern (FFQ)                    | 1.00                                                                                    | 0.91 (0.53, 1.57) | 1.13 (0.66, 1.94) | 0.78 (0.42, 1.46) | 0.439 |
| Protein rich pattern (FFQ)                    | 1.00                                                                                    | 0.65 (0.38, 1.12) | 0.51 (0.28, 0.93) | 0.78 (0.42, 1.45) | 0.441 |
| Vegetable-fruit-rice<br>pattern (FFQ)         | 1.00                                                                                    | 1.37 (0.75, 2.50) | 1.77 (1.02, 3.08) | 1.54 (0.84, 2.84) | 0.149 |
| <b>Three-day food dairies</b>                 |                                                                                         |                   |                   |                   |       |
| Traditional pattern (TFD)                     | 1.00                                                                                    | 0.79 (0.44, 1.45) | 1.06 (0.61, 1.84) | 0.73 (3.71, 1.44) | 0.787 |
| Sweet foods pattern (TFD)                     | 1.00                                                                                    | 1.53 (0.87, 2.71) | 1.08 (0.56, 2.05) | 1.47 (0.81, 2.66) | 0.531 |
| Fried food-bean-dairy<br>pattern (TFD)        | 1.00                                                                                    | 0.69 (0.42, 1.15) | 0.55 (0.31, 0.98) | 0.64 (0.35, 1.19) | 0.427 |
| Whole grain-seafood<br>pattern (TFD)          | 1.00                                                                                    | 0.71 (0.39, 1.30) | 0.73 (0.42, 1.27) | 0.91 (0.53, 1.57) | 0.612 |

Adjusted for other dietary patterns derived from the same dietary assessment tool (TFD or FFQ), pre-pregnancy BMI, age, parity, family income, education level, ethnicity, smoking status, total daily calorie intake, physical activity, gestational weight gain, paternal BMI

Q1: quartile 1; Q2: quartile 2; Q3: quartile 3; Q4: quartile 4; OR: odd ratio; CI: confidence interval; FFQ: food frequency questionnaire; TFD: three-day food dairies; BMI: body mass index



**Table S5. Associations of maternal dietary pattern scores during pregnancy, in quartiles, with BMI z-score across the infancy in the “Born in Shenyang” Cohort.**

| Maternal Dietary Patterns during pregnancy | Infant BMI z-score (n=937) |                        |                        |                        |             |
|--------------------------------------------|----------------------------|------------------------|------------------------|------------------------|-------------|
|                                            | Q1<br>Reference            | Q2<br>$\beta$ (95% CI) | Q3<br>$\beta$ (95% CI) | Q4<br>$\beta$ (95% CI) | P for trend |
| <b>Food Frequency Questionnaire</b>        |                            |                        |                        |                        |             |
| Fish-seafood pattern (FFQ)                 |                            |                        |                        |                        |             |
| Model 1                                    | 0.00                       | -0.04 (-0.17, 0.10)    | -0.03 (-0.16, 0.11)    | -0.04 (-0.17, 0.10)    | 0.678       |
| Model 2                                    | 0.00                       | 0.03 (-0.11, 0.18)     | 0.06 (-0.09, 0.21)     | 0.08 (-0.08, 0.24)     | 0.372       |
| Model 3                                    | 0.00                       | -0.05 (-0.19, 0.09)    | -0.03 (-0.16, 0.11)    | -0.04 (-0.18, 0.10)    | 0.712       |
| Model 4                                    | 0.00                       | 0.01 (-0.14, 0.15)     | 0.04 (-0.11, 0.19)     | 0.05 (-0.11, 0.22)     | 0.479       |
| Protein rich pattern (FFQ)                 |                            |                        |                        |                        |             |
| Model 1                                    | 0.00                       | -0.17 (-0.30, -0.03)   | -0.15 (-0.28, -0.01)   | -0.16 (-0.30, -0.03)   | 0.037       |
| Model 2                                    | 0.00                       | -0.19 (-0.33, -0.05)   | -0.19 (-0.34, -0.04)   | -0.21 (-0.37, -0.05)   | 0.022       |
| Model 3                                    | 0.00                       | -0.15 (-0.28, -0.01)   | -0.11 (-0.25, 0.03)    | -0.13 (-0.27, 0.01)    | 0.123       |
| Model 4                                    | 0.00                       | -0.16 (-0.30, -0.02)   | -0.14 (-0.29, 0.01)    | -0.17 (-0.36, -0.01)   | 0.072       |
| Vegetable-fruit-rice pattern (FFQ)         |                            |                        |                        |                        |             |
| Model 1                                    | 0.00                       | 0.05 (-0.08, 0.19)     | 0.12 (-0.02, 0.26)     | 0.02 (-0.12, 0.15)     | 0.623       |
| Model 2                                    | 0.00                       | 0.07 (-0.07, 0.20)     | 0.14 (0.00, 0.28)      | 0.05 (-0.09, 0.19)     | 0.403       |
| Model 3                                    | 0.00                       | 0.06 (-0.08, 0.19)     | 0.15 (0.01, 0.28)      | 0.06 (-0.07, 0.20)     | 0.230       |
| Model 4                                    | 0.00                       | 0.07 (-0.06, 0.21)     | 0.16 (0.03, 0.30)      | 0.09 (-0.05, 0.23)     | 0.145       |
| <b>Three-day food dairies</b>              |                            |                        |                        |                        |             |
| Traditional pattern (TFD)                  |                            |                        |                        |                        |             |
| Model 1                                    | 0.00                       | 0.03 (-0.10, 0.17)     | 0.10 (-0.04, 0.23)     | 0.02 (-0.11, 0.16)     | 0.716       |
| Model 2                                    | 0.00                       | 0.04 (-0.10, 0.17)     | 0.08 (-0.05, 0.22)     | 0.01 (-0.13, 0.14)     | 0.731       |
| Model 3                                    | 0.00                       | 0.07 (-0.07, 0.21)     | 0.14 (-0.01, 0.29)     | 0.09 (-0.08, 0.26)     | 0.294       |
| Model 4                                    | 0.00                       | 0.06 (-0.08, 0.20)     | 0.11 (-0.04, 0.26)     | 0.05 (-0.12, 0.22)     | 0.267       |
| Sweet foods pattern (TFD)                  |                            |                        |                        |                        |             |
| Model 1                                    | 0.00                       | 0.06 (-0.07, 0.20)     | -0.03 (-0.16, 0.11)    | 0.01 (-0.13, 0.14)     | 0.781       |
| Model 2                                    | 0.00                       | 0.09 (-0.04, 0.23)     | 0.02 (-0.12, 0.15)     | 0.05 (-0.09, 0.18)     | 0.750       |
| Model 3                                    | 0.00                       | 0.06 (-0.08, 0.19)     | -0.01 (-0.15, 0.13)    | 0.03 (-0.11, 0.17)     | 0.876       |
| Model 4                                    | 0.00                       | 0.08 (-0.05, 0.22)     | 0.03 (-0.11, 0.17)     | 0.06 (-0.08, 0.20)     | 0.814       |
| Fried food-bean-dairy pattern (TFD)        |                            |                        |                        |                        |             |
| Model 1                                    | 0.00                       | -0.13 (-0.26, 0.01)    | -0.18 (-0.32, -0.05)   | -0.19 (-0.33, -0.06)   | 0.742       |
| Model 2                                    | 0.00                       | -0.13 (-0.27, 0.01)    | -0.19 (-0.33, -0.06)   | -0.21 (-0.35, -0.07)   | 0.752       |
| Model 3                                    | 0.00                       | -0.11 (-0.24, 0.02)    | -0.17 (-0.31, -0.03)   | -0.19 (-0.33, -0.05)   | 0.854       |
| Model 4                                    | 0.00                       | -0.11 (-0.25, 0.02)    | -0.18 (-0.31, -0.04)   | -0.19 (-0.34, -0.05)   | 0.847       |
| Whole grain-seafood pattern (TFD)          |                            |                        |                        |                        |             |
| Model 1                                    | 0.00                       | -0.16 (-0.29, -0.02)   | -0.07 (-0.21, 0.07)    | -0.02 (-0.15, 0.12)    | 0.825       |
| Model 2                                    | 0.00                       | -0.14 (-0.28, -0.01)   | -0.06 (-0.19, 0.08)    | 0.03 (-0.11, 0.16)     | 0.825       |

|         |      |                      |                     |                    |       |
|---------|------|----------------------|---------------------|--------------------|-------|
| Model 3 | 0.00 | -0.16 (-0.29, -0.02) | -0.07 (-0.21, 0.06) | 0.02 (-0.11, 0.16) | 0.455 |
| Model 4 | 0.00 | -0.14 (-0.27, -0.01) | -0.06 (-0.20, 0.08) | 0.05 (-0.08, 0.19) | 0.425 |

---

Model 1: crude model

Model 2: adjusted for other dietary patterns derived from the same dietary assessment tool (TFD or FFQ)

Model 3: adjusted for pre-pregnancy BMI, age, parity, family income, education level, ethnicity, smoking status, total energy intake, physical activity, paternal BMI

Model 4: model 2 + model 3

BMI: body mass index; Q1: quartile 1; Q2: quartile 2; Q3: quartile 3; Q4: quartile 4; CI: confidence interval; FFQ: food frequency questionnaire; TFD: three-day food diaries

**Table S6. Associations of maternal dietary pattern scores during pregnancy, in quartiles, with WFL z-score across the infancy in the “Born in Shenyang” Cohort.**

| Maternal Dietary Patterns during pregnancy | Infant WFL z-score (n=937) |                        |                        |                        |             |
|--------------------------------------------|----------------------------|------------------------|------------------------|------------------------|-------------|
|                                            | Q1<br>Reference            | Q2<br>$\beta$ (95% CI) | Q3<br>$\beta$ (95% CI) | Q4<br>$\beta$ (95% CI) | P for trend |
| <b>Food Frequency Questionnaire</b>        |                            |                        |                        |                        |             |
| Fish-seafood pattern (FFQ)                 |                            |                        |                        |                        |             |
| Model 1                                    | 0.00                       | -0.03 (-0.17, 0.10)    | -0.04 (-0.17, 0.10)    | -0.03 (-0.16, 0.11)    | 0.769       |
| Model 2                                    | 0.00                       | 0.03 (-0.11, 0.18)     | 0.05 (-0.10, 0.20)     | 0.09 (-0.08, 0.25)     | 0.310       |
| Model 3                                    | 0.00                       | -0.04 (-0.18, 0.10)    | -0.03 (-0.17, 0.11)    | -0.03 (-0.16, 0.11)    | 0.811       |
| Model 4                                    | 0.00                       | 0.01 (-0.13, 0.16)     | 0.03 (-0.12, 0.18)     | 0.06 (-0.10, 0.22)     | 0.432       |
| Protein rich pattern (FFQ)                 |                            |                        |                        |                        |             |
| Model 1                                    | 0.00                       | -0.16 (-0.30, -0.02)   | -0.13 (-0.27, 0.010)   | -0.16 (-0.29, -0.04)   | 0.047       |
| Model 2                                    | 0.00                       | -0.20 (-0.34, -0.05)   | -0.18 (-0.33, -0.03)   | -0.21 (-0.37, -0.05)   | 0.022       |
| Model 3                                    | 0.00                       | -0.14 (-0.27, 0.00)    | -0.09 (-0.23, 0.05)    | -0.12 (-0.25, 0.02)    | 0.176       |
| Model 4                                    | 0.00                       | -0.16 (-0.30, -0.02)   | -0.12 (-0.27, 0.03)    | -0.16 (-0.32, 0.01)    | 0.091       |
| Vegetable-fruit-rice pattern (FFQ)         |                            |                        |                        |                        |             |
| Model 1                                    | 0.00                       | 0.06 (-0.08, 0.19)     | 0.12 (-0.01, 0.26)     | 0.04 (-0.10, 0.17)     | 0.446       |
| Model 2                                    | 0.00                       | 0.07 (-0.06, 0.21)     | 0.14 (0.01, 0.28)      | 0.07 (-0.07, 0.21)     | 0.266       |
| Model 3                                    | 0.00                       | 0.06 (-0.08, 0.19)     | 0.15 (0.01, 0.29)      | 0.08 (-0.06, 0.22)     | 0.152       |
| Model 4                                    | 0.00                       | 0.07 (-0.07, 0.20)     | 0.17 (0.03, 0.30)      | 0.10 (-0.04, 0.24)     | 0.092       |
| <b>Three-day food dairies</b>              |                            |                        |                        |                        |             |
| Traditional pattern (TFD)                  |                            |                        |                        |                        |             |
| Model 1                                    | 0.00                       | 0.02 (-0.12, 0.15)     | 0.09 (-0.04, 0.23)     | 0.00 (-0.13, 0.14)     | 0.892       |
| Model 2                                    | 0.00                       | 0.02 (-0.12, 0.15)     | 0.08 (-0.06, 0.22)     | -0.01 (-0.15, 0.13)    | 0.889       |
| Model 3                                    | 0.00                       | 0.05 (-0.09, 0.19)     | 0.13 (-0.02, 0.28)     | 0.07 (-0.10, 0.23)     | 0.430       |
| Model 4                                    | 0.00                       | 0.04 (-0.10, 0.18)     | 0.10 (-0.05, 0.25)     | 0.02 (-0.15, 0.19)     | 0.395       |
| Sweet foods pattern (TFD)                  |                            |                        |                        |                        |             |
| Model 1                                    | 0.00                       | 0.09 (-0.05, 0.22)     | -0.02 (-0.16, 0.12)    | 0.02 (-0.12, 0.15)     | 0.806       |
| Model 2                                    | 0.00                       | 0.11 (-0.02, 0.25)     | 0.02 (-0.12, 0.16)     | 0.05 (-0.08, 0.19)     | 0.798       |
| Model 3                                    | 0.00                       | 0.08 (-0.05, 0.21)     | 0.00 (-0.14, 0.13)     | 0.04 (-0.09, 0.18)     | 0.782       |
| Model 4                                    | 0.00                       | 0.10(-0.03, 0.24)      | 0.03 (-0.10, 0.17)     | 0.07 (-0.07, 0.21)     | 0.734       |
| Fried food-bean-dairy pattern (TFD)        |                            |                        |                        |                        |             |
| Model 1                                    | 0.00                       | -0.09 (-0.22, 0.05)    | -0.17 (-0.30, -0.03)   | -0.18 (-0.31, -0.04)   | 0.994       |
| Model 2                                    | 0.00                       | -0.09 (-0.23, 0.05)    | -0.17 (-0.31, -0.04)   | -0.19 (-0.33, -0.05)   | 0.993       |
| Model 3                                    | 0.00                       | -0.07 (-0.20, 0.07)    | -0.15 (-0.29, -0.02)   | -0.16 (-0.30, -0.02)   | 0.984       |
| Model 4                                    | 0.00                       | -0.07 (-0.21, 0.07)    | -0.16 (-0.30, -0.02)   | -0.17 (-0.31, -0.03)   | 0.987       |
| Whole grain-seafood pattern (TFD)          |                            |                        |                        |                        |             |
| Model 1                                    | 0.00                       | -0.16 (-0.29, -0.02)   | -0.05 (-0.19, 0.08)    | -0.03 (-0.17, 0.10)    | 0.934       |
| Model 2                                    | 0.00                       | -0.14 (-0.28, -0.01)   | -0.04 (-0.18, 0.09)    | 0.01 (-0.13, 0.15)     | 0.927       |

|         |      |                      |                     |                    |       |
|---------|------|----------------------|---------------------|--------------------|-------|
| Model 3 | 0.00 | -0.16 (-0.29, -0.03) | -0.06 (-0.19, 0.08) | 0.01 (-0.13, 0.15) | 0.533 |
| Model 4 | 0.00 | -0.15 (-0.28, -0.01) | -0.05 (-0.18, 0.09) | 0.04 (-0.10, 0.1)  | 0.512 |

---

Model 1: crude model

Model 2: adjusted for other dietary patterns derived from the same dietary assessment tool (TFD or FFQ)

Model 3: adjusted for pre-pregnancy BMI, age, parity, family income, education level, ethnicity, smoking status, total energy intake, physical activity, paternal BMI

Model 4: model 2 + model 3

WFL: weight for length; BMI: body mass index; Q1: quartile 1; Q2: quartile 2; Q3: quartile 3; Q4: quartile 4; CI: confidence interval; FFQ: food frequency questionnaire; TFD: three-day food diaries
